# Supplementary material for: Intestinal barrier dysfunction plays an integral role in arthritis pathology and can be targeted to ameliorate disease
Source: PubMed Central journal article supplement (PMC8280953; doi:10.1016/j.medj.2021.04.013), 2021-07-09
Supplement: mmc1.pdf [file mmc1.pdf]

**Med, Volume 2**

**Supplemental information**

**Intestinal barrier dysfunction plays  
an integral role in arthritis pathology  
and can be targeted to ameliorate disease**

**Diana E. Matei, Madhvi Menon, Dagmar G. Alber, Andrew M. Smith, Bahman Nedjat-Shokouhi, Alessio Fasano, Laura Magill, Amanda Duhlin, Samuel Bitoun, Aude Gleizes, Salima Hacein-Bey-Abina, Jessica J. Manson, Elizabeth C. Rosser, The ABIRISK Consortium, Nigel Klein, Paul A. Blair, and Claudia Mauri**

**Supplemental Table 1. Summary data of patients and healthy controls. Related to Figure 1.**

| <b>Index</b>                                                             | <b>RA (n=167)</b> | <b>Early RA (n=8)</b>  | <b>Pre-RA (n=9)</b> | <b>HC (n=34)</b> |
|--------------------------------------------------------------------------|-------------------|------------------------|---------------------|------------------|
| Female (%)                                                               | 77.77%            | 100%                   | 100%                | 70.83%           |
| Age                                                                      | 52.97±15.88       | 44.29±8.95             | 51.143±14.4         | 49.94±17.6       |
| Smoking                                                                  | 21.66% (n=60)     | Unk                    | Unk                 | 27.27%<br>(n=22) |
| Infections                                                               | 3 (2.38%)         | 0                      | 0                   | N/A              |
| Metabolic disorders                                                      | 11 (8.73%)        | 3 (42.86%)             | 2 (28.57%)          | N/A              |
| ESR (mm/h)                                                               | 17.22±20.42       | 25.5±7.5<br>(6 Unk)    | N/A                 | N/A              |
| CRP (g/L)                                                                | 7.44±15.91        | 12.54±19.12            | N/A                 | N/A              |
| DAS28 score                                                              | 3.46±1.62         | 2.725±0.275<br>(6 Unk) | N/A                 | N/A              |
| RF+                                                                      | 80.36% (n=56)     | 87.5%                  | 88.89%              | N/A              |
| CCP+                                                                     | 73.21% (n=56)     | 100%                   | 44.45%              | N/A              |
| <b>Treatments</b>                                                        |                   |                        |                     |                  |
| NSAIDs                                                                   | 18 (10.78%)       | 1 (12.5%)              | 1 (11.11%)          | N/A              |
| DMARDs                                                                   | 101 (60.47%)      | 2 (25%)                | 2 (22.22%)          | N/A              |
| Glucocorticoids                                                          | 19 (11.38%)       | 1 (12.5%)              | 0                   | N/A              |
| Biologics - Anti-TNF $\alpha$<br>(Adalimumab,<br>Infliximab, Etanercept) | 46 (27.55%)       | 0                      | 0                   | N/A              |
| Biologics - Anti-IL-6R<br>(Tocilizumab)                                  | 7 (4.19%)         | 0                      | 0                   | N/A              |
| Biologics - Anti-CD20<br>(Rituximab)                                     | 7 (4.19%)         | 0                      | 0                   | N/A              |
| Untreated                                                                | 18 (10.78%)       | 4 (50%)                | 6 (66.67%)          | N/A              |

Unk- Unknown, ESR- erythrocyte sedimentation rate, CRP- C-reactive protein, DAS28- 28 Joint disease activity score, RF- rheumatoid factor, CCP - cyclic citrullinated peptide, NSAID- non-steroidal anti-inflammatory drug, DMARD- disease modifying anti-rheumatic drugs.



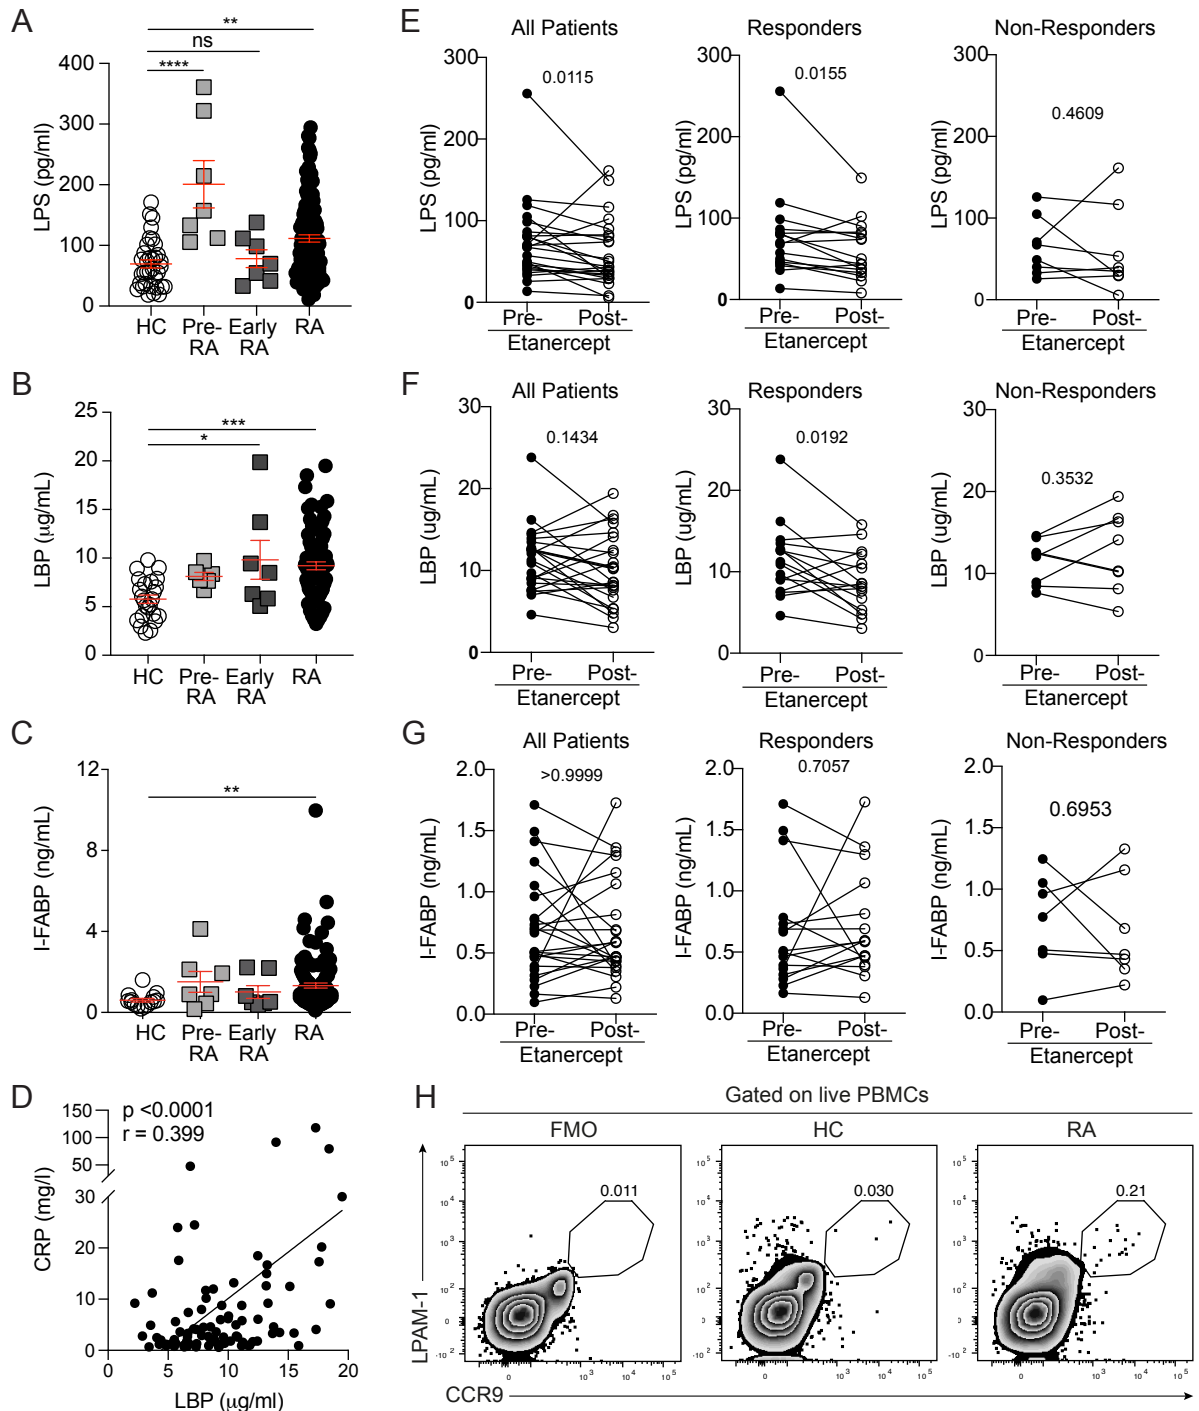

**Supplemental Figure 1**

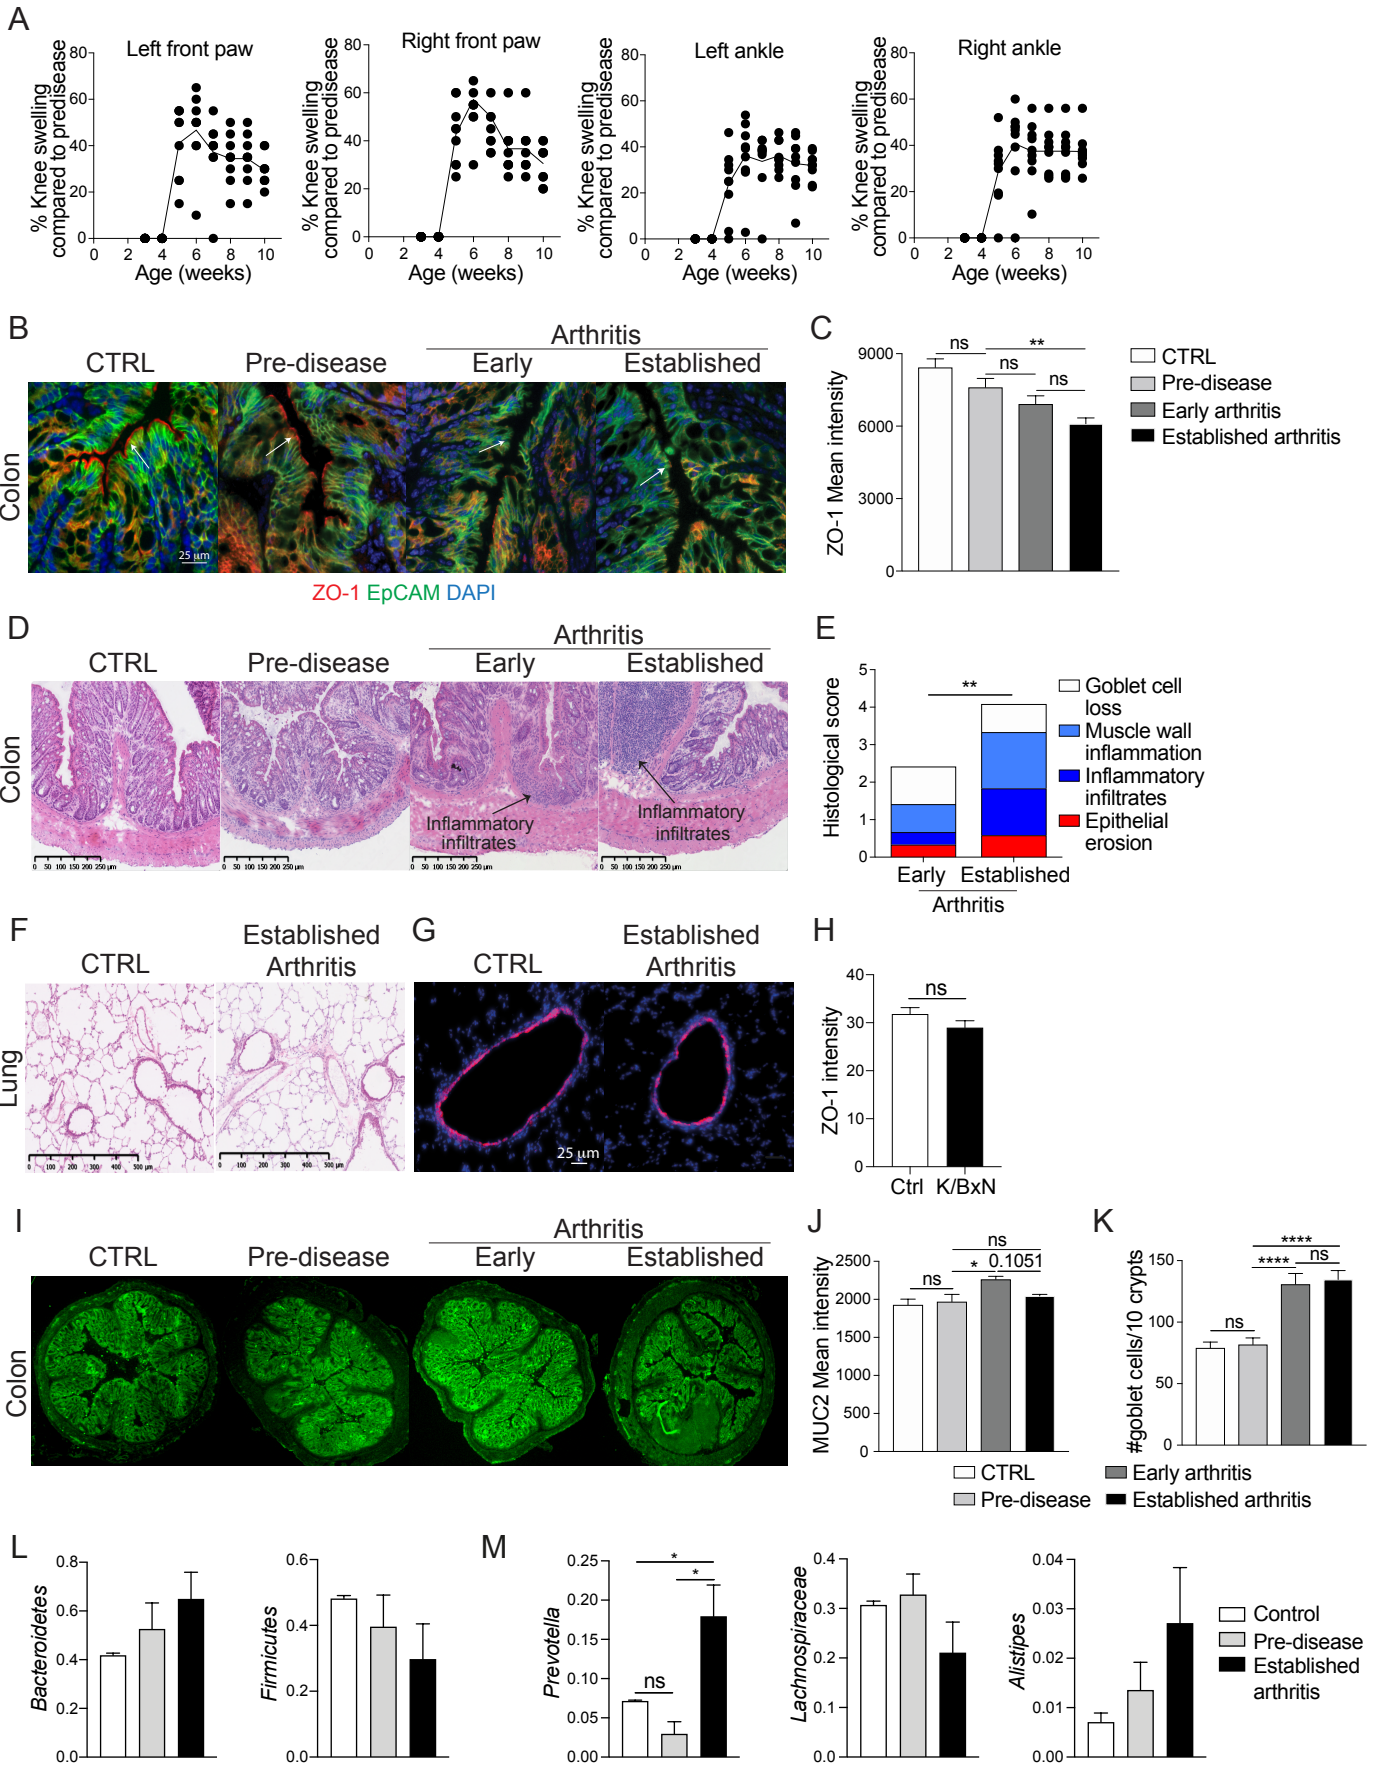

**Supplemental Figure 2**

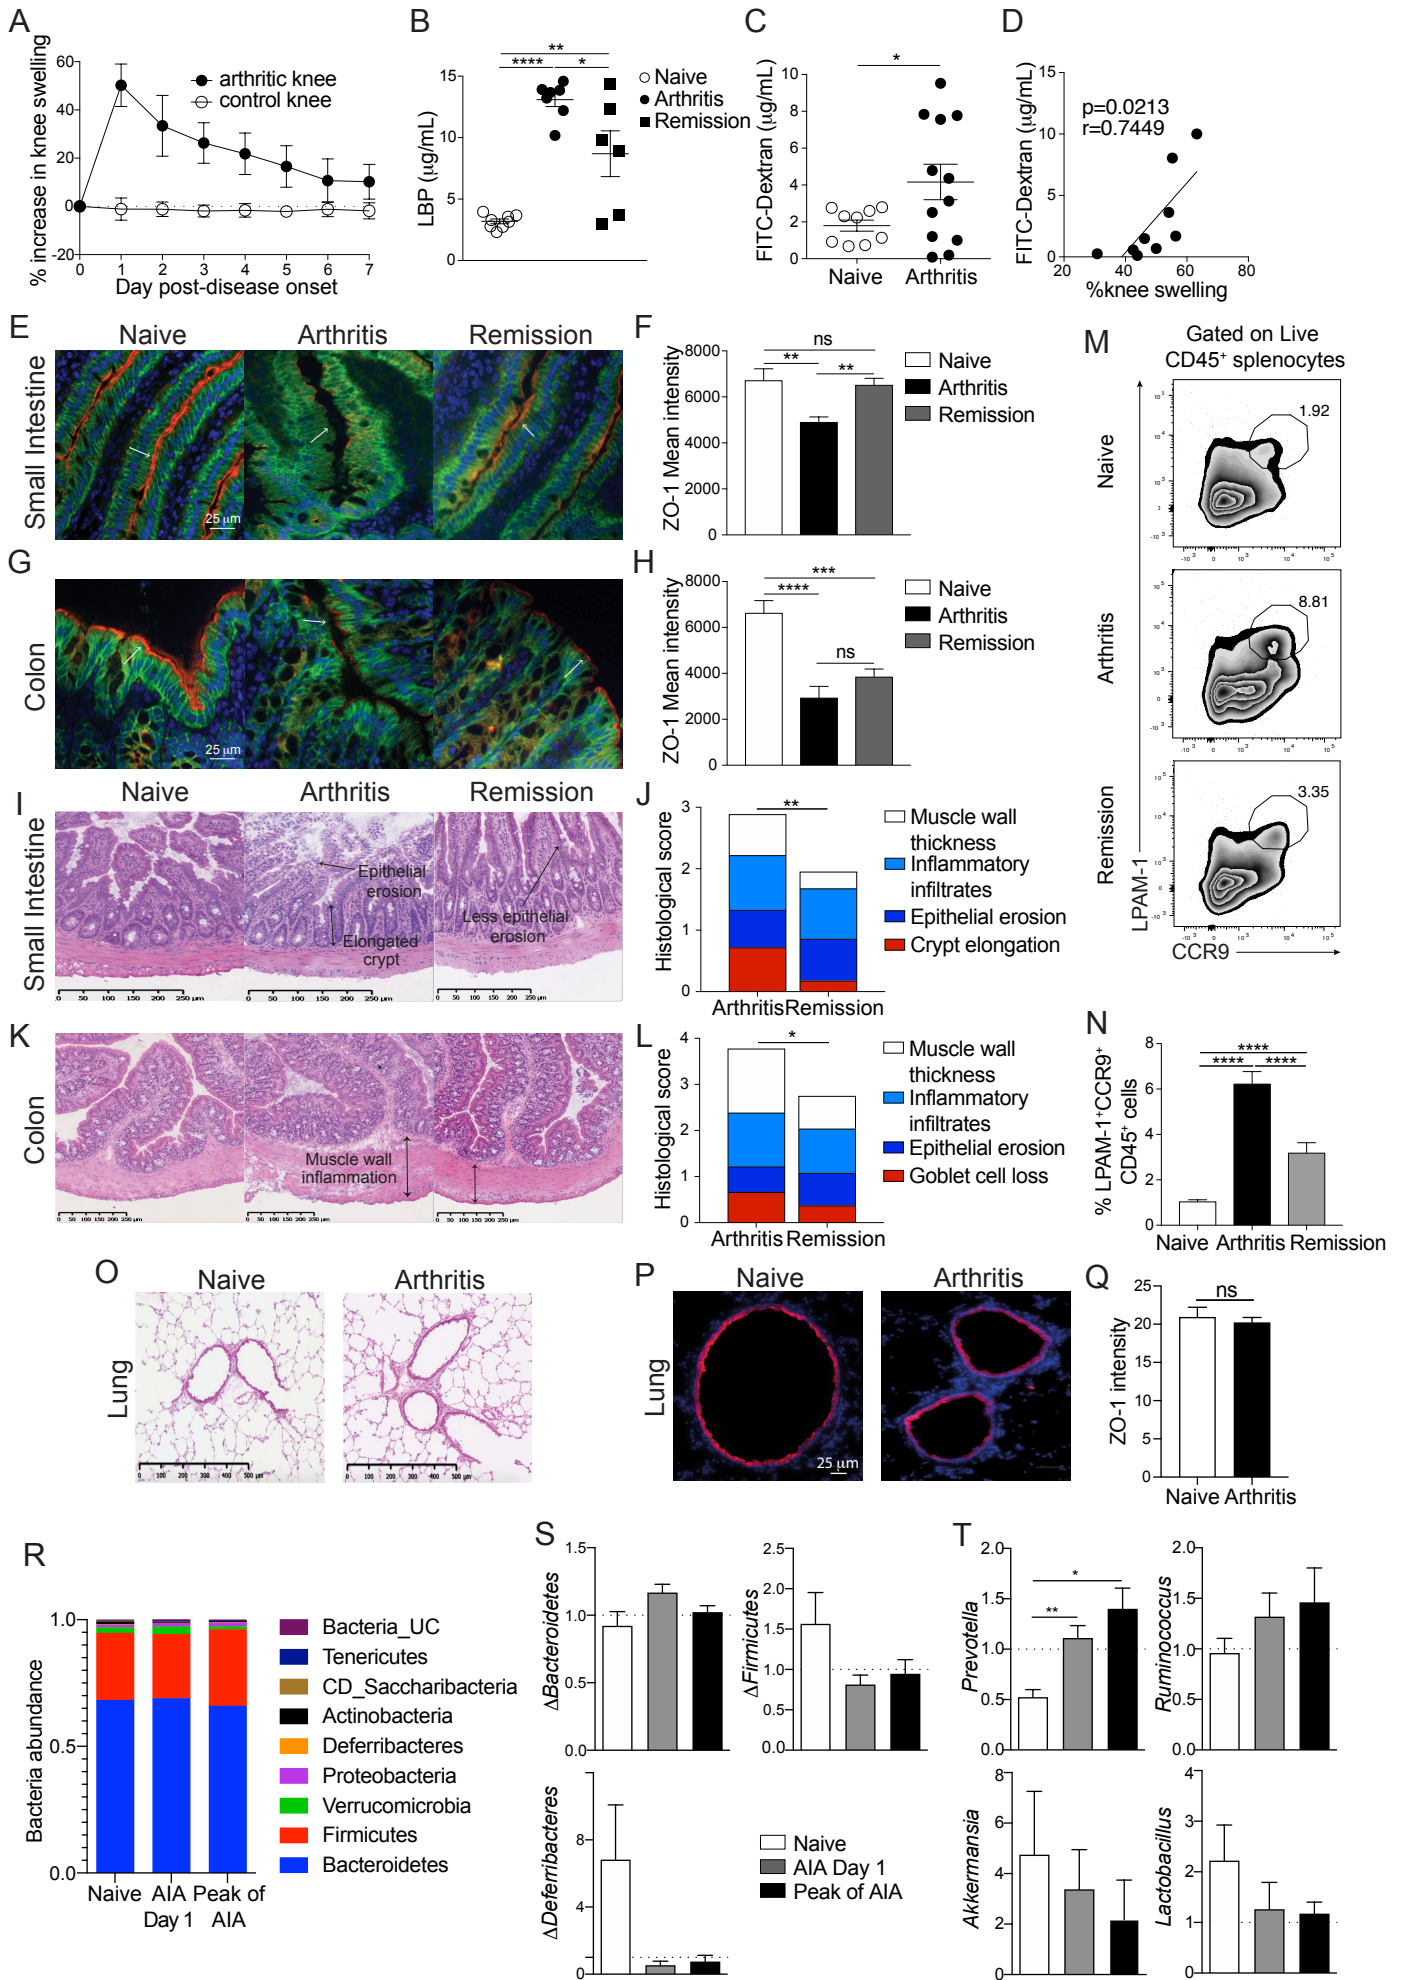

**Supplemental Figure 3**

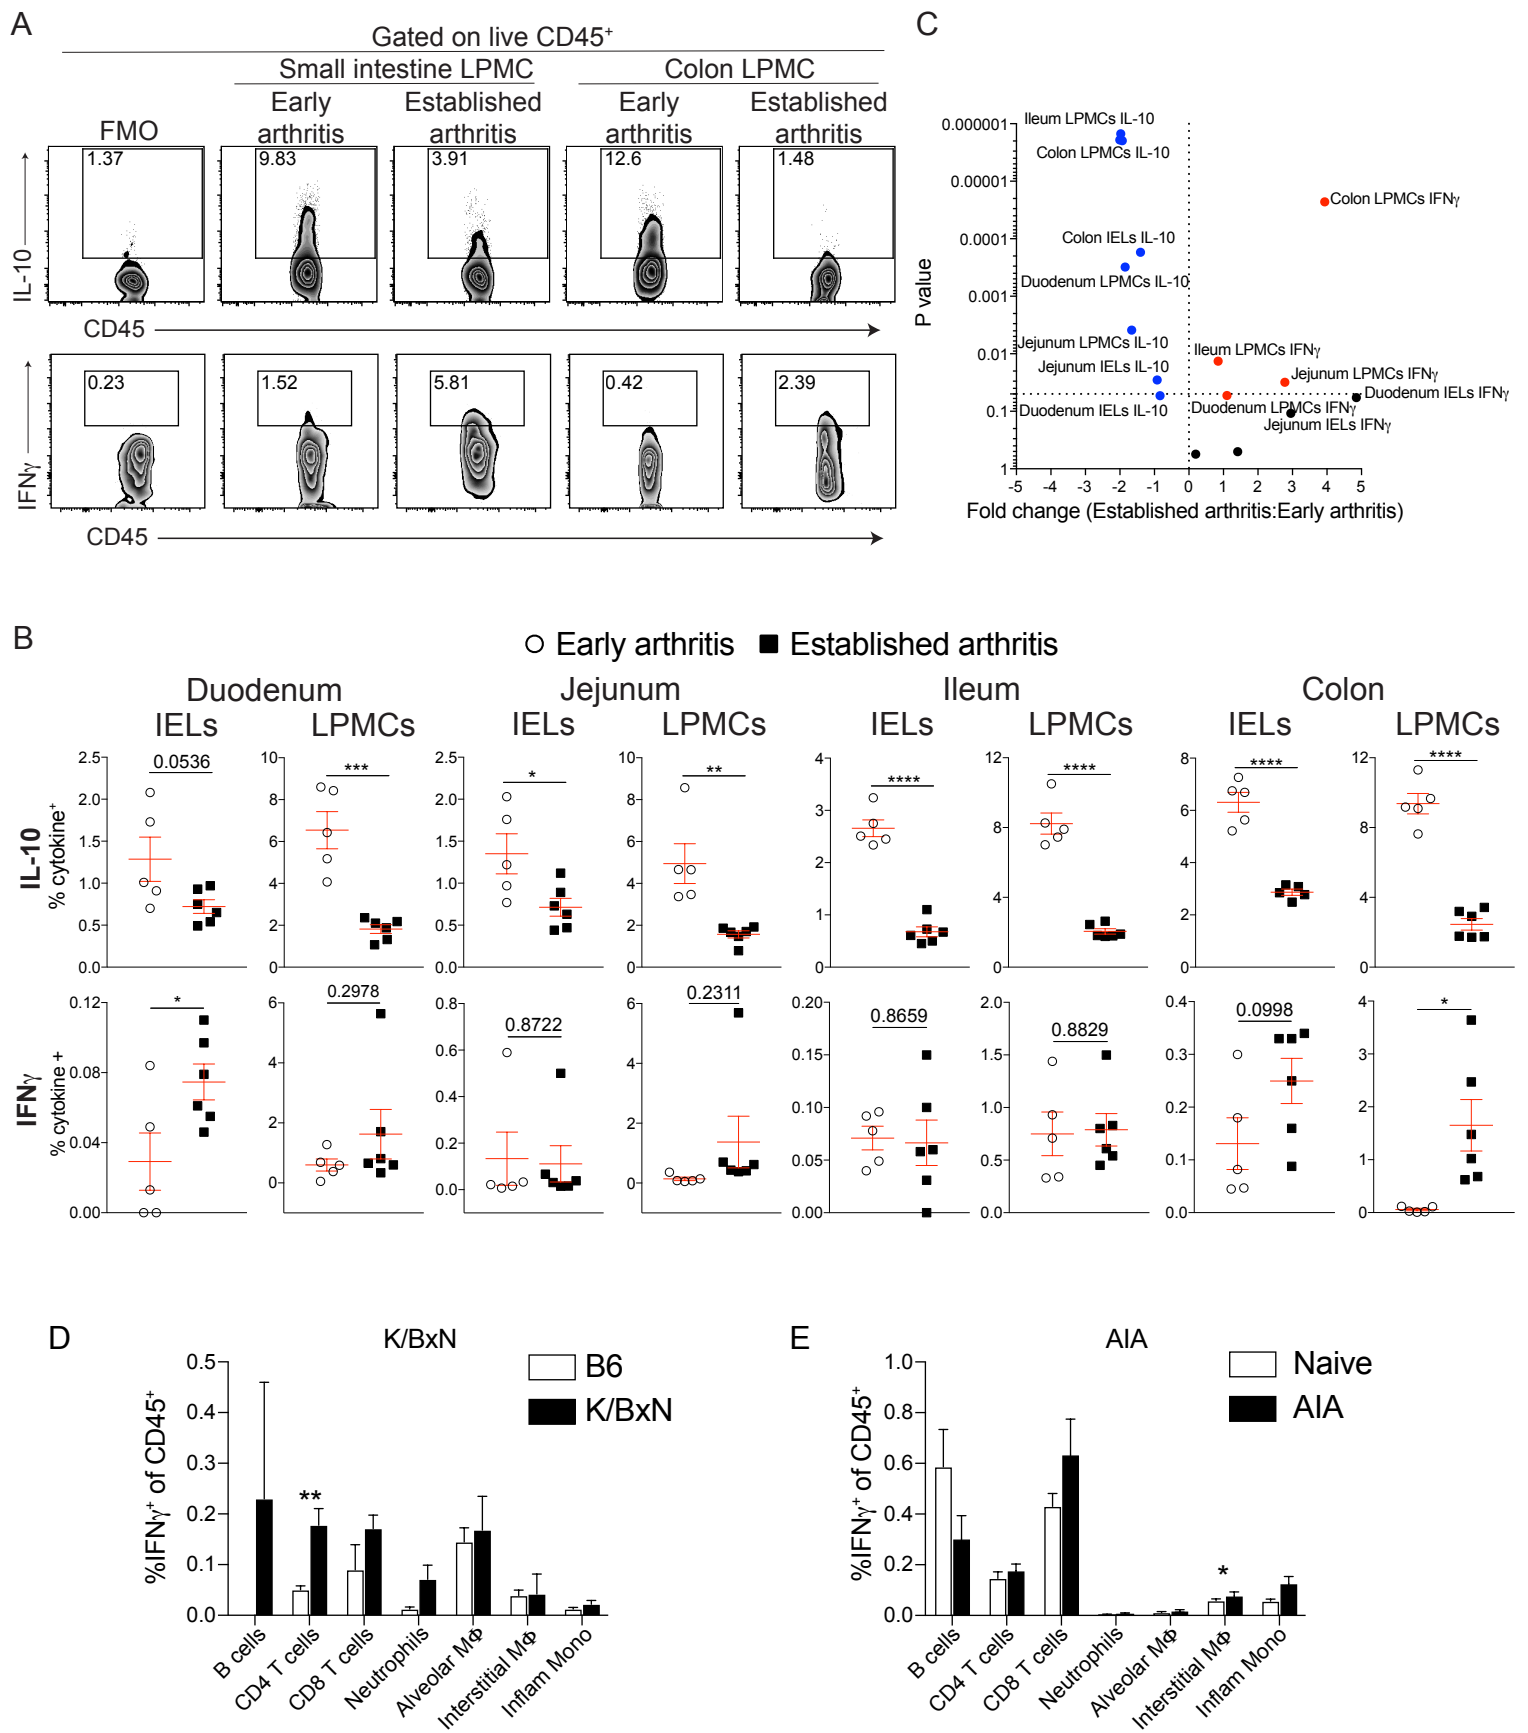

Supplemental Figure 4



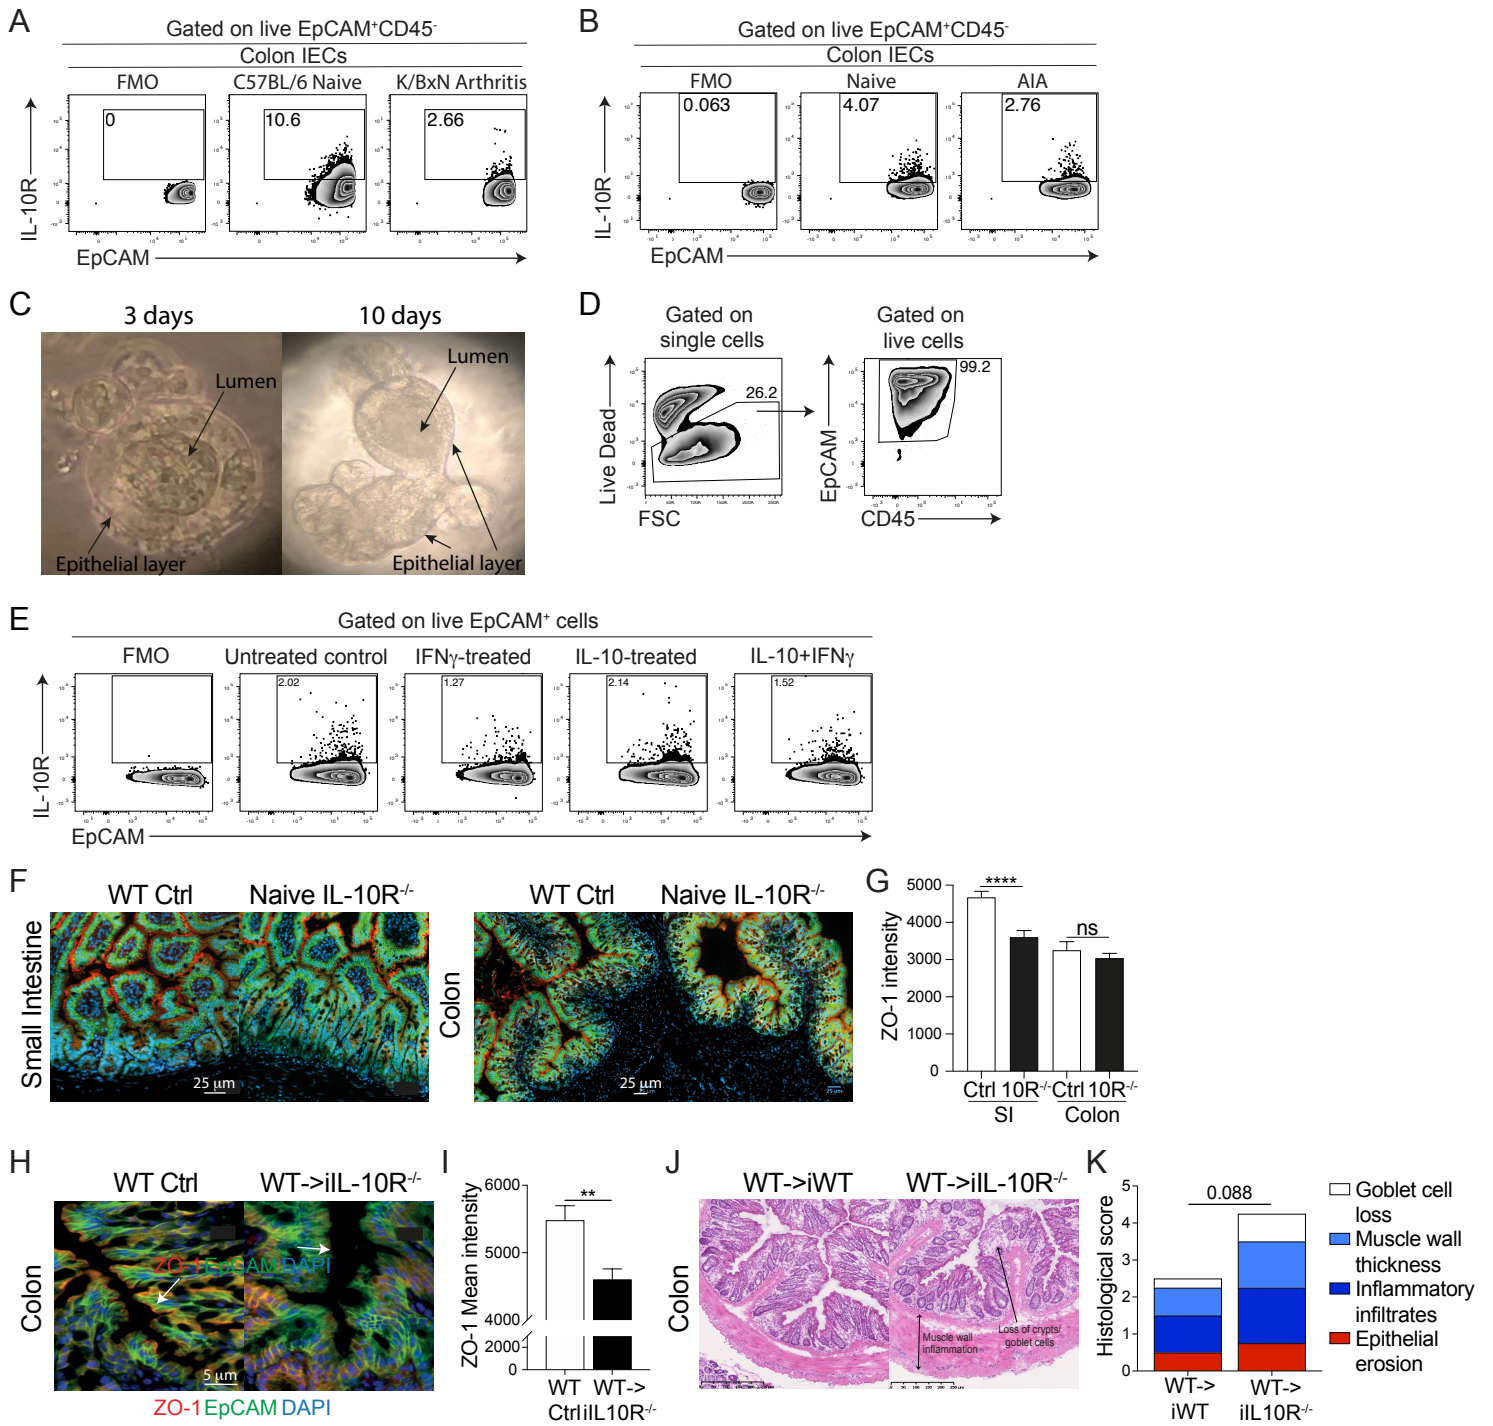

**Supplemental Figure 5**

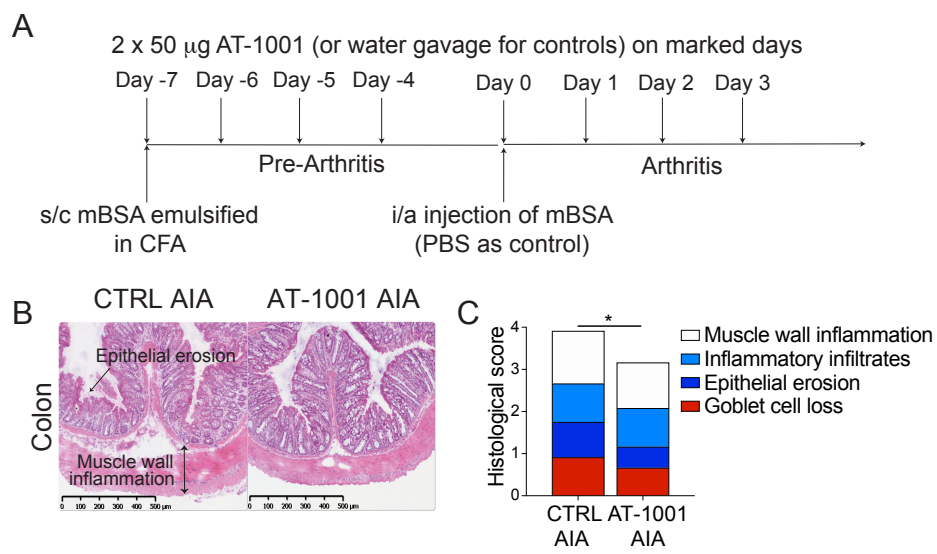

**Supplemental Figure 6**

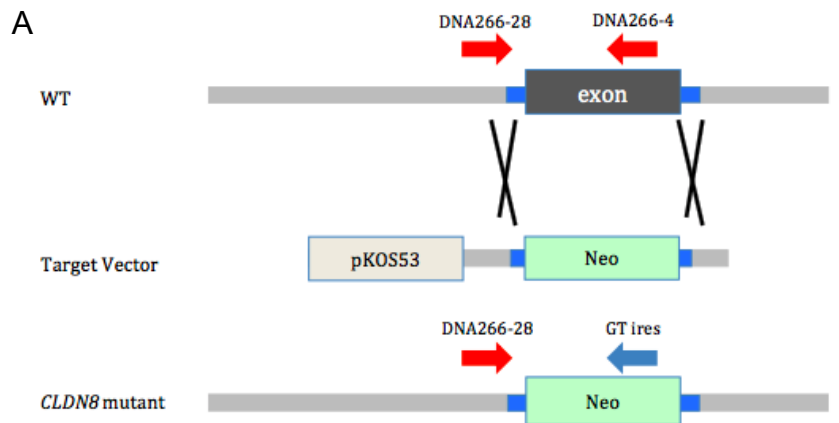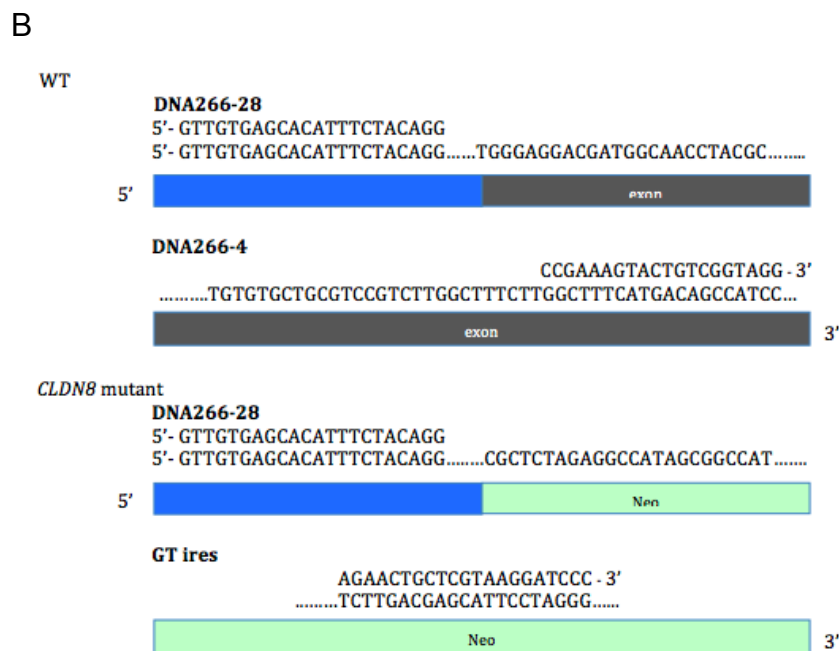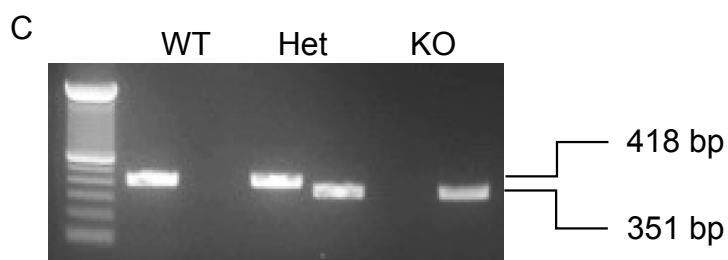

**Supplemental Methods Figure 1**

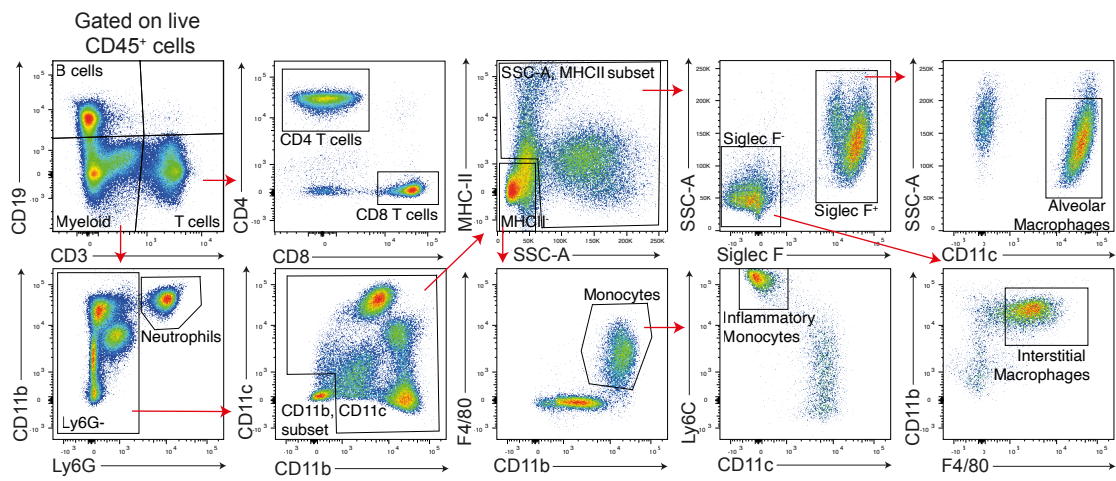

**Supplemental Methods Figure 2**



**Supplemental Figure 1. NSAIDs do not have a significant effect on intestinal permeability, whereas etanercept partly corrects it. Related to Figure 1. (A-C)** Concentration of **(A)** LPS, **(B)** LPS-binding protein (LBP) and **(C)** I-FABP in the serum of healthy individuals (HC, n=34) and in patients with pre-rheumatoid arthritis (pre-RA; n=7), early RA (n=7) and RA patients excluding those treated with NSAIDs (n=99), as measured by ELISA. **(D)** Correlation between LBP and CRP levels in the serum of RA patients (n=124). **(E-G)** Concentration of **(E)** LPS, **(F)** LBP, and **(G)** I-FABP in the serum of RA patients pre- and post-etanercept treatment (approximately 6 months post-treatment). Left – all patients (n=24), Centre – treatment responders ( $\Delta$ DAS28>1.2, n=16), Right – non-responders ( $\Delta$ DAS28<1.2, n=8). **(H)** Representative FACS plots displaying LPAM-1<sup>+</sup>CCR9<sup>+</sup> live peripheral blood mononuclear cells (PBMC) isolated from RA patients and healthy controls (HC). \*P < 0.05, \*\*P < 0.01, \*\*\*P < 0.001. **(A, B, C)** one-way ANOVA with multiple comparisons calculated by Tukey's test. **(D)** Pearson's correlation. **(E, F, G)** paired t test. Data represent mean  $\pm$  S.E.M.

**Supplemental Figure 2. Mice with arthritis display colonic inflammation and gut microbial dysbiosis. Related to Figure 2 and Figure 3. (A)** Representative time course of knee swelling in K/BxN mice with spontaneous arthritis. Knee swelling displayed as a percentage increase of knee size as compared to pre-disease initiation (n=5/group). **(B-E)** **(B)** Representative ZO-1 staining, **(C)** mean ZO-1 intensity, **(D)** representative H&E staining and **(E)** histological scores for the colon of K/BxN mice throughout arthritis development and compared to naïve C57BL/6 control. **(F-H)** **(F)** Representative H&E staining, **(G)** representative ZO-1 staining, and **(H)** mean ZO-1 intensity for lungs from K/BxN mice with established arthritis and CTRL naïve mice. **(I-K)** **(I)** Representative MUC2 staining, **(J)** mean MUC2 intensity and **(K)** goblet cell counts from PAS staining for the colon of K/BxN mice throughout arthritis development and compared to naïve C57BL/6 control. **(L)** Bar charts showing the abundance of the noted bacterial phyla in samples collected from K/BxN mice at pre-disease (3 wk old, n=4) and established arthritis (6 wk old, n=4) stages, compared to Control (KRN, n=3). **(M)** Bar charts showing the abundance of the noted bacterial genera in samples collected from K/BxN mice at pre-disease (3 wk old, n=4) and established arthritis (6 wk old, n=4) stages, compared to Control (KRN, n=3). \*P < 0.05, \*\*P < 0.01, \*\*\*\*P < 0.0001, ns: no significance. **(C, J, K, L, M)** one-way ANOVA, **(E)** two-way ANOVA, **(H)** unpaired t test. For panels **A-K** one of two experiments is shown. Data represent mean  $\pm$  S.E.M.

**Supplemental Figure 3. Mice with AIA display increased gut permeability and inflammation and gut microbial dysbiosis from day 1 of arthritis. Related to Figure 2 and Figure 3. (A)** Representative time course of knee swelling in AIA in C57BL/6 WT mice. Knee swelling displayed as percentage increase of knee size as compared to pre-disease induction (n=5/group). **(B)** Concentration of LBP in the serum of WT naïve, arthritic mice (AIA day 3), and mice in remission from arthritis (AIA day 7) (n=5/group). **(C)** Levels of FITC-dextran in the serum of WT naïve (n=9) and arthritic (n=12) mice (AIA day 3). **(D)** Correlation between FITC-dextran in the serum and %knee swelling in mice at day 3 of AIA (n=9). **(E-L)** **(E, G)** Representative ZO-1 staining, **(F, H)** mean ZO-1 intensity, **(I, K)** representative H&E staining and **(J, L)** histological scores for SI and colon, respectively, from WT naïve and arthritic mice

(AIA day 3) and mice in remission from arthritis (AIA day 7). **(M, N)** **(M)** Representative FACS plots and **(N)** bar chart showing the mean expression of LPAM-1 and CCR9 by total CD45<sup>+</sup> splenocytes from naïve WT mice, arthritic mice, and mice in remission from arthritis (n=3/group). **(O-Q)** **(O)** Representative H&E staining, **(P)** representative ZO-1 staining, and **(Q)** mean ZO-1 intensity for lungs from WT naïve and arthritic mice (AIA day 3). **(R)** Bar chart showing relative bacterial composition at phylum level in samples collected from mice at AIA day 1 and Peak of AIA (day 3), compared to naïve mice. **(S)** Bar charts showing the change in the abundance of the noted bacterial phyla between samples collected at AIA day 1 from naïve and arthritic mice, and at Peak of AIA from arthritic mice, compared to their abundance in the same mice at days 1-4 (prior to arthritis induction). **(T)** Bar charts showing the abundance of the noted bacterial genera in samples collected at AIA day 1 and Peak of AIA (day 3), compared to naïve mice. (n=10/group). \*P < 0.05, \*\*P < 0.01, \*\*\*P < 0.001, \*\*\*\*P < 0.0001, ns: no significance. **(B, F, H, N, S, T)** one-way ANOVA, **(C, Q)** unpaired t test, **(D)** Pearson's correlations, **(J, L)** two-way ANOVA. UC - Unclassified, CD - Candidatus. For panels **A-Q** one of two experiments is shown. Data represent mean ± S.E.M.

**Supplemental Figure 4. Increased IFN $\gamma$  and decreased IL-10 expression in the guts of arthritic K/BxN mice. Related to Figure 4.** **(A)** Representative FACS plots displaying cytokine production by total CD45<sup>+</sup> lamina propria mononuclear cells (LPMC) isolated from the small intestine or colon of early-disease K/BxN mice and K/BxN mice with established arthritis. **(B)** Graphs displaying cytokine expression and **(C)** volcano plot showing the fold change in cytokine expression by total CD45<sup>+</sup> intra-epithelial lymphocytes (IEL) and lamina propria mononuclear cells (LPMC) isolated from the noted tissues of early-disease K/BxN mice (n=5) and mice with established arthritis (n=6), as assessed by flow cytometry. **(D, E)** Bar charts showing IFN $\gamma$  expression by the noted immune cell subsets isolated from lungs of **(D)** K/BxN and C57BL/6 control mice, and from **(E)** C57BL/6 arthritic and naïve mice (n=5/group), as assessed by flow cytometry. M $\Phi$ - Macrophage; Inflam Mono- Inflammatory Monocytes. \*P < 0.05, \*\*P < 0.01, \*\*\*P < 0.001, \*\*\*\*P < 0.0001 **(B, D, E,** unpaired t test). Data represent mean ± S.E.M.

**Supplemental Figure 5. IL-10R expression by IECs ex vivo and organoids in vitro, ZO-1 expression on global IL-10R<sup>-/-</sup> and gut inflammation in non-hematopoietic cell IL-10R<sup>-/-</sup> chimeric mice. Related to Figure 4.** **(A)** Representative FACS plots of IL-10R on colonic intestinal epithelial cells in naïve C57BL/6 control versus K/BxN arthritic mice and in **(B)** naïve versus arthritic (day 3 of AIA) C57BL/6 mice. **(C)** Representative brightfield scans of growing organoids: left - budding organoids after 3 days in culture, right - mature organoids after approximately 10 days in culture. **(D)** Representative FACS plots showing organoid survival (left) and epithelial cell purity (right). **(E)** Representative FACS plots showing IL-10R expression by epithelial cells isolated from organoids treated with recombinant IFN $\gamma$  and/or IL-10, or left untreated. **(F, G)** Representative ZO-1 staining and mean ZO-1 intensity from SI and colon of naïve IL-10R<sup>-/-</sup> mice and WT control. **(H, I)** Representative ZO-1 staining and mean ZO-1 intensity from colon of naïve non-hematopoietic cell IL-10R<sup>-/-</sup> chimeric mice (WT->iIL-10R<sup>-/-</sup>) and WT control. **(J, K)** Representative H&E staining and histological scores of the colon of WT->iIL-10R<sup>-/-</sup> and WT->iWT chimeric mice on day 3 of arthritis. \*\*P < 0.01, \*\*\*\*P < 0.0001. **(G, I)** unpaired t test, **(K)** two-way ANOVA. For all panels one of two experiments is shown. Data represent mean ± S.E.M.

**Supplemental Figure 6. Modulating gut permeability using AT-1001 improves gut pathology. Related to Figure 6. (A)** Schematic of AT-1001 treatment regime for mice during induction of arthritis (s/c- subcutaneous, i/a- intra-articular). **(B)** Representative H&E staining and **(C)** mean histological scores of the colon of untreated and AT-1001-treated arthritic mice (AIA day 3). \*P < 0.05. **(C)** two-way ANOVA. For all panels one of two experiments is shown. Data represent mean ± S.E.M.

**Supplemental Methods Figure 1. Generation of *Cldn8*<sup>-/-</sup> mouse. Related to STAR methods Mice section. (A)** Schematic of the targeting strategy for *Cldn8*<sup>-/-</sup> mice. WT *Cldn8* gene has 1 exon. The target vector, pKOS-53 with a LacZ/Neo cassette, was targeted to *Cldn8* gene by homologous recombination. **(B)** Primers DNA266-28, DNA266-4, and GT ires were used to distinguish WT alleles (418 bps) from mutant alleles (351 bps). **(C)** PCR verification of mouse *Cldn8* gene deletion from an ear punch biopsy using primers DNA266-28, DNA266-4, and GT ires.

**Supplemental Methods Figure 2. Gating strategy for immune cells isolated from arthritic and control lungs. Related to STAR methods Cell Preparation section.** Representative FACS plots of subset gating for lymphocytes isolated from the lung of a naive C57BL/6 mouse.
